# Supplementary material
Source: publisher site journal article supplement (http://www.kjim.org/upload/media/kjim-2019-204-suppl4.pdf)
Supplement: Supplementary file 1 [file kjim-2019-204-suppl4.pdf]

**Supplementary Table 4. Association between variants in or near its target genes and disease and traits in NHGRI-EBI GWAS**

| Trait                 | SNP            | Chr:Pos        | Phenotype, disease, and trait                                         | Reported gene(s) | Associated allele | p value  | β Coefficient        |
|-----------------------|----------------|----------------|-----------------------------------------------------------------------|------------------|-------------------|----------|----------------------|
| FEV <sub>1</sub>      | rs7742369      | 6:34,165,721   | Birth weight                                                          | HMGA1            | G                 | 1.00E-08 | 0.0268 unit increase |
|                       |                |                | Height                                                                | HMGA1            | G                 | 1.00E-13 | 0.11 cm increase     |
| Height                | rs2780226      | 6:34,199,092   | Height                                                                | HMGA1            | T                 | 8.00E-28 | 0.076 unit decrease  |
|                       |                |                | Waist circumference adjusted for BMI                                  | CYCSSL1, HMGA1   | C                 | 8.00E-10 | 0.0504 cm increase   |
| Height                | rs1150781      | 6:34,214,322   | Height                                                                | HMGA1, C6orf1    | C                 | 2.00E-08 | 0.0048 unit increase |
|                       | 11:130,247,700 | 11:130,247,700 | -                                                                     | -                | -                 | -        | -                    |
|                       | 12:110,390,979 | 12:110,390,979 | -                                                                     | -                | -                 | -        | -                    |
|                       | rs114591848    | 14:21,550,212  | -                                                                     | -                | -                 | -        | -                    |
| FEV <sub>1</sub> /FVC | rs7671167      | 4:89,883,979   | COPD                                                                  | FAM13A           | -                 | 1.00E-11 | Odd ratio = 1.32     |
|                       |                |                | Post bronchodilator FEV <sub>1</sub>                                  | FAM13A           | T                 | 9.00E-08 | 0.046 unit decrease  |
|                       |                |                | Post bronchodilator FEV <sub>1</sub> /FVC ratio                       | FAM13A           | T                 | 2.00E-10 | 0.011 unit decrease  |
|                       | rs2239688      | 6:32,054,212   | -                                                                     | -                | -                 | -        | -                    |
|                       | rs2070600      | 6:32,151,443   | COPD                                                                  | AGER             | C                 | 6.00E-10 | Odd ratio = 1.24     |
|                       |                |                | Emphysema imaging measurement                                         | AGER             | T                 | 5.00E-09 | 0.14 unit decrease   |
|                       |                |                | FEV <sub>1</sub> /FVC ratio                                           | AGER             | T                 | 3.00E-25 | 0.14 unit increase   |
|                       |                |                | FEV <sub>1</sub> /FVC ratio, forced expiratory volume, PF measurement | AGER, PPT2       | T                 | 3.00E-14 | Odd ratio = 1.0      |

NHGRI-EBI, National Human Genome Research Institute-European Bioinformatics Institute; GWAS, genome-wide association study; SNP, single nucleotide polymorphism; Chr, chromosome; Pos, position; FEV<sub>1</sub>, forced expiratory volume in 1 second; HMGA1, high mobility group AT-hook 1; BMI, body mass index; CYCSSL1, cytochrome C, somatic-like 1; FVC, forced vital capacity; COPD, chronic obstructive pulmonary disease; FAM13A, family with sequence similarity 13 member A; AGER, advanced glycosylation end-product specific receptor; PF, pulmonary function; PPT2, palmitoyl-protein thioesterase 2.
